# Supplementary material
Source: Springer Nature journal article supplement (https://www.springerprofessional.de/resource/supplementary/13638_2012_370_MOESM8_ESM.pdf/11897500)
Supplement: MOESM8 [file 11897500]

PIR sensor

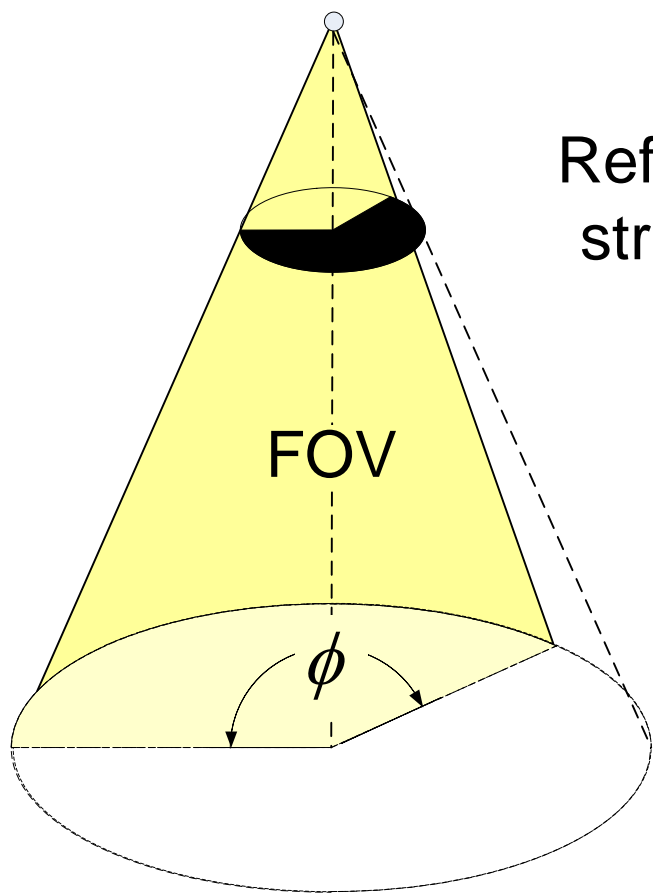

(a)

PIR sensor

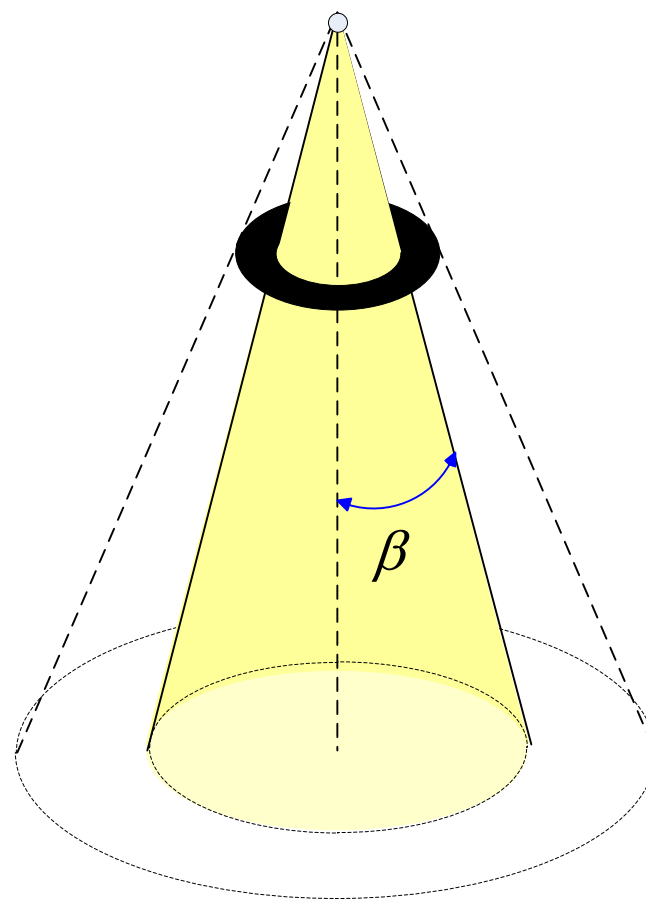

(b)

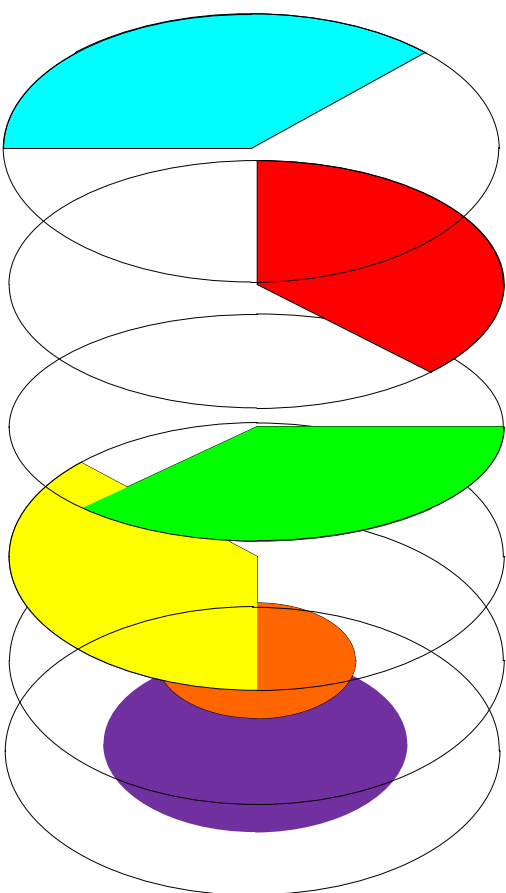

(c)

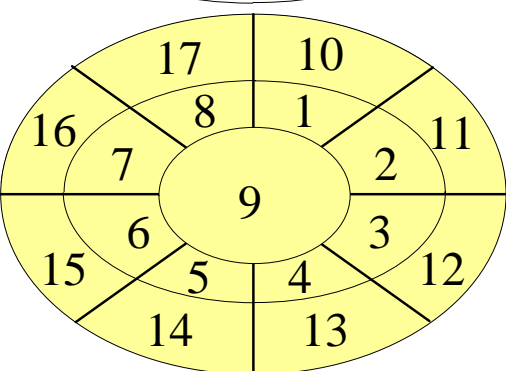

Sampling cells

Reference structure

Measurement space

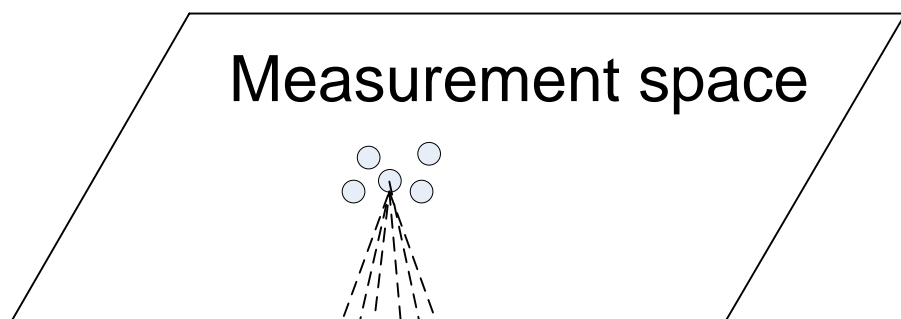

Reference structure

Thermal source

Multiplexing

Object space

(d)
